# Supplementary material for: Cell wall characteristics during sexual reproduction of Mougeotia sp. (Zygnematophyceae) revealed by electron microscopy, glycan microarrays and RAMAN spectroscopy
Source: PubMed Central journal article supplement (PMC8523461; doi:10.1007/s00709-021-01659-5), 2021-05-11
Supplement: 709_2021_1659_MOESM2_ESM.pdf [file 709_2021_1659_MOESM2_ESM.pdf]

## Supplementary Table:

### Cell wall characteristics during sexual reproduction of *Mougeotia* sp. (Zygnematophyceae) revealed by electron microscopy, glycan microarrays and RAMAN spectroscopy

Protoplasma

Charlotte Permann<sup>+</sup>, Klaus Herburger<sup>+</sup>, Martin Niedermeier, Martin Felhofer, Notburga Gierlinger, Andreas Holzinger<sup>\*</sup>

+ These authors have contributed equally to the study

\*Author for correspondence: [Andreas.Holzinger@uibk.ac.at](mailto:Andreas.Holzinger@uibk.ac.at)

Department of Botany, University of Innsbruck, Functional Plant Biology, 6020 Innsbruck, Austria

**Suppl. Table S1** Sampling dates and coordinates of field samples with zygospores or conjugating stages of *Mougeotia*

| Sample Number | Sampling site | Sampling Date | Coordinates              | Species                    |
|---------------|---------------|---------------|--------------------------|----------------------------|
| 1             | 1             | 20.07.2019    | N47°19'56"<br>O11°09'84" | <i>Mougeotia parvula</i>   |
| 2             | 2             | 31.08.2019    | N47°21'76"<br>O11°03'77" | <i>Mougeotia disjuncta</i> |
| 3             | 2             | 23.05.2020    | N47°21'76"<br>O11°03'77" | <i>Mougeotia disjuncta</i> |
| 4             | 2             | 12.07.2020    | N47°21'76"<br>O11°03'77" | <i>Mougeotia disjuncta</i> |
| 5             | 2             | 06.09.2020    | N47°21'76"<br>O11°03'77" | <i>Mougeotia disjuncta</i> |

**Suppl. Table S2** Cell wall probes used in the present study

| No. | Polymer class | Code                                             | Epitope                                        | Source               | Reference                  |
|-----|---------------|--------------------------------------------------|------------------------------------------------|----------------------|----------------------------|
| 1   | Pectin        | 2F4                                              | Ca <sup>2+</sup> cross linked HG               | PlantProbes          | Liners et al. 1989         |
| 2   |               | JIM5                                             | Homogalactauronan with a low DE                | PlantProbes          | Willats et al. 2000        |
| 3   |               | JIM7                                             | Homogalactauronan with a high DE               | PlantProbes          | Willats et al. 2000        |
| 4   |               | LM19                                             | Methylesterified homogalactauronan (low DE)    | PlantProbes          | Verhertbruggen et al. 2009 |
| 5   |               | LM20                                             | Methylesterified homogalactauronan (high DE)   | PlantProbes          | Verhertbruggen et al. 2009 |
| 6   |               | INRA-RU2                                         | Backbone of rhamnogalacturonan I (4 units)     | INRA                 | Ralet et al. 2010          |
| 7   |               | INRA-RU1                                         | Backbone of rhamnogalacturonan I (12 units)    | INRA                 | Ralet et al. 2010          |
| 8   |               | LM5                                              | (1→4)-β-D-galactan                             | PlantProbes          | Jones et al. 1997          |
| 9   |               | LM6                                              | (1→5)-α-L-arabinan                             | PlantProbes          | Willats et al. 1998        |
| 10  |               | LM13                                             | Linearised (1→5)-α-L-arabinan                  | PlantProbes          | Moller et al. 2008         |
| 11  |               | LM16                                             | (1→5)-α-L-arabinan, RG backbone                | PlantProbes          | Verhertbruggen et al. 2009 |
| 12  | Xyloglucan    | LM8                                              | Xylogalacturonan                               | PlantProbes          | Willats et al. 2004        |
| 13  |               | LM15                                             | Xyloglucan (XXXG motif)                        | PlantProbes          | Marcus et al. 2008         |
| 14  |               | LM24                                             | Xyloglucan (XLLG motif, weak to XXLG)          | PlantProbes          | Pedersen et al. 2012       |
| 15  | LM25          | Xyloglucan (XXXG, XXLG, XLLG motif; also GGGGGG) | PlantProbes                                    | Pedersen et al. 2012 |                            |
| 16  | Xylan         | LM10                                             | (1→4)-β-D-xylan (low-substituted)              | PlantProbes          | McCartney et al. 2005      |
| 17  |               | LM11                                             | (1→4)-β-D-xylan (low-substituted)/arabinoxylan | PlantProbes          | McCartney et al. 2005      |
| 18  |               | LM23                                             | (1→4)-β-D-xylan/xylogalacturonan               | PlantProbes          | Pedersen et al. 2012       |
| 19  | β-glucans     | BS-400-2                                         | (1→3)-β-D-glucan                               | Biosupplies          | Meikle et al. 1991         |

|    |           |          |                                                                  |                     |                         |
|----|-----------|----------|------------------------------------------------------------------|---------------------|-------------------------|
| 20 |           | BS-400-3 | (1→3) (1→4)-β-D-glucan                                           | Biosupplies         | Meikle et al. 1994      |
| 21 | Mannans   | BS-400-4 | (1→4)-β-D-mannan                                                 | Biosupplies         | Pettolino et al. 2001   |
| 22 |           | LM21     | (1→4)-β-D-mannan/galactomannan/glucomannan                       | PlantProbes         | Marcus et al. 2010      |
| 23 |           | LM22     | (1→4)-β-D-mannan/glucomannan                                     | PlantProbes         | Marcus et al. 2010      |
| 24 |           | AGPs     | JIM8                                                             | AGP (Gal-rich)      | PlantProbes             |
| 25 | JIM13     |          | β-GlcA-(1→3)-α-GalA-(1→2)-α-Rha)                                 | PlantProbes         | Knox et al. 1991        |
| 26 | LM2       |          | AGP (1→6)-β-Gal with terminal β-GlcA)                            | PlantProbes         | Smallwood et al. 1996   |
| 27 | LM14      |          | AGP, enriched Ara, Gal and aldouronic acid                       | PlantProbes         | Moller et al. 2008      |
| 28 | MAC207    |          | AGP (β-GlcA-(1→3)-α-GalA-(1→2)-α-Rha)                            | PlantProbes         | Pennell. et al. 1989    |
| 29 | Extensins | LM1      | Extensin (hydroxyproline-rich motif THRGP)                       | PlantProbes         | Smallwood et al. 1995   |
| 30 |           | LM3      | Extensin                                                         | PlantProbes         | Feng et al. 2014        |
| 31 |           | JIM11    | Extensin                                                         | PlantProbes         | Smallwood et al. 1994   |
| 32 |           | JIM12    | Extensin                                                         | PlantProbes         | Smallwood et al. 1994   |
| 33 |           | JIM19    | Extensin                                                         | PlantProbes         | Smallwood et al. 1994   |
| 34 |           | JIM20    | Extensin                                                         | PlantProbes         | Smallwood et al. 1994   |
| 35 | Cellulose | CBM3a    | Crystalline cellulose                                            | PlantProbes         | Blake et al. 2006       |
| 36 |           | CBM2a    | Crystalline cellulose                                            | PlantProbes         | McLean et al. 2000      |
| 37 | Lectins   | B-1005   | Concanavalin A; α-linked mannose                                 | Vector Laboratories | Yue et al. 2009         |
| 38 |           | B-1015   | Soybean agglutinin; α- or β-linked GalNAc                        | Vector Laboratories | Yue et al. 2009         |
| 39 |           | B-1025   | Wheat germ agglutinin; dimers and trimers of GlcNAc              | Vector Laboratories | Yue et al. 2009         |
| 40 |           | B-1085   | Ricinus communis agglutinin; Gal or GalNAc residues              | Vector Laboratories | Yue et al. 2009         |
| 41 |           | B-1285   | Bauhinia purpurea lectin; Gal-α-(1→3) GalNAc, terminal GalNAc    | Vector Laboratories | Yue et al. 2009         |
| 42 |           | B-1305   | Sambucus nigra lectin; sialic acid attached to term. Gal, GalNAc | Vector Laboratories | Yue et al. 2009         |
| 43 |           | B-1335   | Euonymus europaeus lectin; Gal-α-(1→3)-Fuc-α-(1→2)-Gal           | Vector Laboratories | Opitz et al. 2007       |
| 44 |           | B-1365   | Psophocarpus tetragonolobus lectin; GalNAc                       | Vector Laboratories | McCarter et al. 2013    |
| 45 |           | B-1405   | Psophocarpus tetragonolobus lectin II; Gal and GalNAc            | Vector Laboratories | Barkhordari et al. 2004 |

## Supporting references

Liners F, Letesson JJ, Didembourg C, et al. (1989) Monoclonal antibodies against pectin: recognition of a conformation induced by calcium. *Plant Physiol* 91:1419-1424.

Barkhordari A, Stoddart RW, McClure SF, et al. (2004) Lectin histochemistry of normal human lung. *J Mol Histol* 35:147-156.

Blake AW, McCartney L, Flint JE, et al. (2006) Understanding the biological rationale for the diversity of cellulose-directed carbohydrate-binding modules in prokaryotic enzymes. *J Biol Chem* 281:29321-29329.

Feng T, Nyffenegger C, Højrup P, et al. (2014) Characterization of an extensin-modifying metalloprotease: N-terminal processing and substrate cleavage pattern of *Pectobacterium carotovorum* Prt1. *Appl Microbiol Biotechnol* 98:10077-10089.

Jones L, Seymour GB, Knox JP (1997) Localization of pectic galactan in tomato cell walls using a monoclonal antibody specific to (1 → 4)-[β]-D-galactan. *Plant Physiol* 113:1405-1412.

Knox JP, Linstead PJ, Cooper JPC, et al. (1991) Developmentally regulated epitopes of cell surface arabinogalactan proteins and their relation to root tissue pattern formation. *Plant J* 1:317-326.

Marcus SE, Blake AW, Benians TA, et al. (2010) Restricted access of proteins to mannan polysaccharides in intact plant cell walls. *Plant J* 64:191-203.

Marcus SE, Verhertbruggen Y, Hervé C, et al. (2008) Pectic homogalacturonan masks abundant sets of xyloglucan epitopes in plant cell walls. *BMC Plant Biol* 8:1-12.

McCabe PF, Valentine TA, Forsberg LS, et al. (1997) Soluble signals from cells identified at the cell wall establish a developmental pathway in carrot. *Plant Cell* 9:2225-2241.

McCarter C, Kletter D, Tang H, et al. (2013) Prediction of glycan motifs using quantitative analysis of multi-lectin binding: Motifs on MUC 1 produced by cultured pancreatic cancer cells. *Proteomics Clin Appl* 7:632-641.

McCartney L, Marcus SE, Knox JP (2005) Monoclonal antibodies to plant cell wall xylans and arabinoxylans. *J Histochem Cytochem* 53:543-546.

- McLean BW, Bray MR, Boraston AB, et al. (2000) Analysis of binding of the family 2a carbohydrate-binding module from *Cellulomonas fimi* xylanase 10A to cellulose: specificity and identification of functionally important amino acid residues. *Protein Eng* 13:801-809.
- Meikle PJ, Bonig I, Hoogenraad NJ, Clarke AE et al. (1991) The location of (1→ 3)- $\beta$ -glucans in the walls of pollen tubes of *Nicotiana glauca* using a (1→ 3)- $\beta$ -glucan-specific monoclonal antibody. *Planta* 185:1-8.
- Meikle PJ, Hoogenraad NJ, Bonig I et al. (1994) A (1→ 3, 1→ 4)- $\beta$ -glucan-specific monoclonal antibody and its use in the quantitation and immunocytochemical location of (1→ 3, 1→ 4)- $\beta$ -glucans. *Plant J* 5:1-9.
- Moller I, Marcus SE, Haeger A, et al. (2008) High-throughput screening of monoclonal antibodies against plant cell wall glycans by hierarchical clustering of their carbohydrate microarray binding profiles. *Glycoconj J* 25:37-48.
- Opitz L, Salaklang J, Büttner H, et al. (2007) Lectin-affinity chromatography for downstream processing of MDCK cell culture derived human influenza A viruses. *Vaccine* 25:939-947.
- Pedersen HL, Fangel JU, McCleary B, et al. (2012) Versatile high resolution oligosaccharide microarrays for plant glycobiology and cell wall research. *J Biol Chem* 287:39429-38.
- Pennell RI, Knox JP, Scofield GN et al. (1989) A family of abundant plasma membrane-associated glycoproteins related to the arabinogalactan proteins is unique to flowering plants. *J Cell Biol* 108:1967-1977.
- Pettolino FA, Hoogenraad NJ, Ferguson C, et al. (2001) A (1→ 4)- $\beta$ -mannan-specific monoclonal antibody and its use in the immunocytochemical location of galactomannans. *Planta*, 214:235-242.
- Ralet MC, Tranquet O, Poulain D, et al. (2010) Monoclonal antibodies to rhamnogalacturonan I backbone. *Planta* 231:1373-1383.
- Smallwood M, Beven A, Donovan N, et al. (1994) Localization of cell wall proteins in relation to the developmental anatomy of the carrot root apex. *Plant J* 5:237-246.
- Smallwood M, Martin H, Knox JP (1995) An epitope of rice threonine- and hydroxyproline-rich glycoprotein is common to cell wall and hydrophobic plasma-membrane glycoproteins. *Planta* 196:510-522.
- Smallwood M, Yates EA, Willats WG, et al. (1996) Immunochemical comparison of membrane-associated and secreted arabinogalactan-proteins in rice and carrot. *Planta* 198:452-459.
- Verhertbruggen Y, Marcus SE, Haeger A, et al. (2009) An extended set of monoclonal antibodies to pectic homogalacturonan. *Carbohydr Res* 344:1858-1862.
- Verhertbruggen Y, Marcus SE, Haeger A, et al. (2009) Developmental complexity of arabinan polysaccharides and their processing in plant cell walls. *Plant J* 59:413-425.
- Willats WGT, Limberg G, Buchholt HC, et al. (2000) Analysis of pectic epitopes recognised by hybridoma and phage display monoclonal antibodies using defined oligosaccharides, polysaccharides, and enzymatic degradation. *Carbohydr Res* 327:309-320.
- Willats WGT, Marcus SE, Knox JP (1998) Generation of a monoclonal antibody specific to (1→ 5)- $\alpha$ -L-arabinan. *Carbohydr Res* 308:149-152.
- Willats WGT, McCartney L, Steele-King CG, et al. (2004) A xylogalacturonan epitope is specifically associated with plant cell detachment. *Planta* 218:673-681.
- Yue T, Goldstein IJ, Hollingsworth MA, et al. (2009) The prevalence and nature of glycan alterations on specific proteins in pancreatic cancer patients revealed using antibody-lectin sandwich arrays. *Mol Cell Proteomics* 8:1697-1707.
